# Supplementary material for: Environmental and Biogeographic Drivers behind Alpine Plant Thermal Tolerance and Genetic Variation
Source: MDPI journal article supplement (doi:10.3390/plants13091271), 2024-05-04
Supplement: s1 [file s1]

## Supporting information

Environmental and biogeographic drivers behind alpine plant thermal tolerance and genetic variation on a local scale

Table S1. Thermal tolerance study sites across three elevation gradients in Kosciuszko National Park of south-east New South Wales, Australia. Key sites where microsite logging stations (logging leaf and air temperature) were established are marked with asterisks (\*). For each elevation gradient, sites are listed in ascending order based on elevation.

| Site                          | Latitude (°) | Longitude (°) | Elevation (m a.s.l) | Aspect |
|-------------------------------|--------------|---------------|---------------------|--------|
| <b>Charlotte Pass</b>         |              |               |                     |        |
| Pipers Creek *                | -36.3927     | 148.4356      | 1636                | S      |
| Snowy River (low) *           | -36.4306     | 148.3218      | 1735                | NW     |
| Charlotte Pass ski hill *     | -36.4355     | 148.3279      | 1811                | NE     |
| Charlotte Pass carpark        | -36.4346     | 148.3270      | 1871                | NE     |
| Blue Lake walk                | -36.4223     | 148.3147      | 1876                | S      |
| Stillwell snow patch *        | -36.4420     | 148.1483      | 1966                | S      |
| Blue Lake lookout *           | -36.4092     | 148.3065      | 1972                | SE     |
| <b>Thredbo</b>                |              |               |                     |        |
| Merritts nature trail (low) * | -36.5002     | 148.3047      | 1417                | SE     |
| Merritts traverse *           | -36.4918     | 148.2951      | 1740                | SE     |
| Merritts nature trail (high)  | -36.4939     | 148.2889      | 1894                | SE     |
| Thredbo River *               | -36.4894     | 148.2839      | 1959                | SE     |
| Kosciuszko walk               | -36.4839     | 148.2820      | 2019                | S      |
| Kosciuszko lookout *          | -36.4801     | 148.2767      | 2059                | S      |
| <b>Perisher</b>               |              |               |                     |        |
| Munyang River *               | -36.3379     | 148.4020      | 1503                | E      |
| Rainbow Lake *                | -36.3700     | 148.4759      | 1598                | NE     |
| Porcupine Rocks (low) *       | -36.4157     | 148.4081      | 1773                | N      |
| Porcupine Rocks (high) *      | -36.4291     | 148.3980      | 1903                | W      |

Table S2. Model fitting process implemented during elevation thermal gradient statistical analysis. The model incorporated a response variable of daily mean minimum temperature ( $T_{\min}$ ; continuous) or daily mean maximum temperature ( $T_{\max}$ ; continuous) and fixed explanatory variable of elevation (continuous). Best model fit was determined based on three components: lowest Akaike Information Criterion (AIC) value, significance between models and the level of variance explained by random effects. Final model selected includes random effect of date (categorical, 3 levels) for both response variables. Linear mixed models fit with R package *lme4* (Bates et al., 2015). Final models selected are shown in bold. Superscripts indicate an incomplete model fit due to singular fits.

| Model                                                                                                                                                                                                                                                                                          | $T_{\min}$ AIC      | $T_{\max}$ AIC      |
|------------------------------------------------------------------------------------------------------------------------------------------------------------------------------------------------------------------------------------------------------------------------------------------------|---------------------|---------------------|
| <i>Basic model</i>                                                                                                                                                                                                                                                                             |                     |                     |
| Response ~ Elevation                                                                                                                                                                                                                                                                           | 150.4               | 234.4               |
| <i>Test random effects of date, to account for weather differences among sampling days, site and site nested within transect, to account for the three elevation gradients; local effects of site aspect and slope; and the spatial grouping of sites within the three elevation gradients</i> |                     |                     |
| Response ~ Elevation + (1 Date)                                                                                                                                                                                                                                                                | <b>152.3</b>        | <b>200.5</b>        |
| Response ~ Elevation + (1 Site)                                                                                                                                                                                                                                                                | 164.7 <sup>*s</sup> | 244.5 <sup>*s</sup> |
| Response ~ Elevation + (1 Transect)                                                                                                                                                                                                                                                            | 164.7 <sup>*s</sup> | 244.5 <sup>*s</sup> |
| Response ~ Elevation + (1  Transect/Site)                                                                                                                                                                                                                                                      | 166.7 <sup>*s</sup> | 246.5 <sup>*s</sup> |

Table S3. Three-step model fitting process implemented during thermal threshold statistical analysis. The model incorporated a response variable of thermal tolerance thresholds: critical cold thresholds ( $T_{crit-cold}$ ; continuous), critical heat thresholds ( $T_{crit-hot}$ ; continuous) or thermal tolerance breadth (TTB; continuous) and fixed explanatory variable of elevation (continuous). Best model fit was determined based on three components: lowest Akaike Information Criterion (AIC) value, significance between models and the level of variance explained by random effects. Final model selected from step 3 includes random intercept of species (categorical, 10 levels) for all three response variables. The  $T_{crit-cold}$  model also included date of sampling (categorical, 8 levels) as an additional random effect and  $T_{crit-hot}$  model also included site (categorical, 17 levels) as an additional random effect. Linear mixed models fit with R package *lme4* (Bates et al., 2015). Best models selected for each step are shown in bold. Superscripts indicate an incomplete model fit, either convergence issues (c) or singular fit (s).

| Model                                                                                                                                                                                                                                                                                                  | $T_{crit-cold}$ AIC | $T_{crit-hot}$ AIC | TTB AIC       |
|--------------------------------------------------------------------------------------------------------------------------------------------------------------------------------------------------------------------------------------------------------------------------------------------------------|---------------------|--------------------|---------------|
| <i>Basic model</i>                                                                                                                                                                                                                                                                                     |                     |                    |               |
| Response ~ Elevation                                                                                                                                                                                                                                                                                   | 2918.5              | 3859.5             | 3394.2        |
| <i>Step 1. Test random intercepts and random slopes for elevation within each level of species</i>                                                                                                                                                                                                     |                     |                    |               |
| Response ~ Elevation + (Elevation Species)                                                                                                                                                                                                                                                             | 2525.5 *c           | 3674.4 *s          | 3196.7 *c     |
| Response ~ Elevation + (1 Species)                                                                                                                                                                                                                                                                     | <b>2521.7</b>       | <b>3673.1</b>      | <b>3194.2</b> |
| <i>Step 2. Test random effects of date, to account for weather differences among sampling days, site and site nested within transect, to account for the three elevation gradients; local effects of site aspect and slope; and the spatial grouping of sites within the three elevation gradients</i> |                     |                    |               |
| Response ~ Elevation + (1 Species)                                                                                                                                                                                                                                                                     | <b>2521.7</b>       | <b>3673.1</b>      | <b>3194.2</b> |
| Response ~ Elevation + (1 Date)                                                                                                                                                                                                                                                                        | 2916.2              | 3870.7             | 3401.8        |
| Response ~ Elevation + (1 Site)                                                                                                                                                                                                                                                                        | 2930.8              | 3872.2             | 3403.8        |
| Response ~ Elevation + (1 Transect)                                                                                                                                                                                                                                                                    | 2934.3 *s           | 3872.2             | 3407.3        |
| Response ~ Elevation + (1  Transect/Site)                                                                                                                                                                                                                                                              | 2932.8 *s           | 3873.4             | 3405.8        |
| <i>Step 3. Test combinations of random effects</i>                                                                                                                                                                                                                                                     |                     |                    |               |
| Response ~ Elevation + (1 Species)                                                                                                                                                                                                                                                                     | 2521.7              | 3673.1             | <b>3194.2</b> |
| Response ~ Elevation + (1 Species) + (1 Date)                                                                                                                                                                                                                                                          | <b>2513.8</b>       | 3672.5             | 3195.9        |
| Response ~ Elevation+ (1 Species) + (1 Site)                                                                                                                                                                                                                                                           | 2521.0              | <b>3671.8</b>      | 3196.2 *s     |
| Response ~ Elevation + (1 Species) + (1 Transect)                                                                                                                                                                                                                                                      | 2523.7 *s           | 3675.0             | 3196.2 *s     |
| Response ~ Elevation + (1 Species) + (1  Transect/Site)                                                                                                                                                                                                                                                | 2523.0 *s           | 3673.8 *s          | 3198.2 *s     |
| Response ~ Elevation+ (1 Species) + (1 Site) + (1 Date)                                                                                                                                                                                                                                                | 2515.6              | 3673.6             | 3197.9 *s     |

Table S4. Model fitting process implemented during thermal threshold statistical analysis. The model incorporated a response variable of thermal tolerance thresholds: critical cold thresholds ( $T_{crit-cold}$ ; continuous), critical heat thresholds ( $T_{crit-hot}$ ; continuous) or thermal tolerance breadth (TTB; continuous) and fixed explanatory variable of species (categorical, 10 levels). Best model fit was determined based on three components: lowest Akaike Information Criterion (AIC) value, significance between models and the level of variance explained by random effects. Final model selected includes random intercepts of date of sampling (categorical, 8 levels) for the  $T_{crit-cold}$  model, site (categorical, 17 levels) for the  $T_{crit-hot}$  model and no random effects for the TTB model. Linear mixed models fit with R package *lme4* (Bates et al., 2015). Final models selected are shown in bold. Superscripts indicate an incomplete model fit due to singular fits.

| Model                                                                                                                                                                                                                                                                                                  | $T_{crit-cold}$ AIC  | $T_{crit-hot}$ AIC   | TTB AIC              |
|--------------------------------------------------------------------------------------------------------------------------------------------------------------------------------------------------------------------------------------------------------------------------------------------------------|----------------------|----------------------|----------------------|
| <i>Basic model</i>                                                                                                                                                                                                                                                                                     |                      |                      |                      |
| Response ~ Species                                                                                                                                                                                                                                                                                     | 2475.6               | 3638.9               | <b>3154.3</b>        |
| <i>Step 1. Test random effects of date, to account for weather differences among sampling days, site and site nested within transect, to account for the three elevation gradients; local effects of site aspect and slope; and the spatial grouping of sites within the three elevation gradients</i> |                      |                      |                      |
| Response ~ Species + (1 Date)                                                                                                                                                                                                                                                                          | <b>2466.1</b>        | 3630.8               | 3144.8 <sup>*s</sup> |
| Response ~ Species + (1 Site)                                                                                                                                                                                                                                                                          | 2474.9               | <b>3628.6</b>        | 3144.8 <sup>*s</sup> |
| Response ~ Species + (1 Transect)                                                                                                                                                                                                                                                                      | 2481.4 <sup>*s</sup> | 3633.5 <sup>*s</sup> | 3144.8 <sup>*s</sup> |
| Response ~ Species + (1  Transect/Site)                                                                                                                                                                                                                                                                | 2476.9 <sup>*s</sup> | 3630.6 <sup>*s</sup> | 3146.8 <sup>*s</sup> |
| <i>Step 2. Test combinations of random effects</i>                                                                                                                                                                                                                                                     |                      |                      |                      |
| Response ~ Species + (1 Date) + (1 Site)                                                                                                                                                                                                                                                               | 2468.0               | 3630.6               | 3146.8 <sup>*s</sup> |

Table S5. Focal species selected to perform species distribution models. Species were selected based on presence of correlations between genetic differentiation ( $F_{ST}$ ) and elevation or distance (ns: non-significant; s: significant) and range of inbreeding coefficient ( $F_{is}$ ) within Kosciuszko National Park (KNP) and across south-eastern Australia. Genetic diversity of each species is considered high or low relative to the other study species. Lower values of  $F_{is}$  indicate higher genetic diversity and higher values of  $F_{is}$  indicate lower genetic diversity.

| Species                   | F <sub>ST</sub> correlations |          |              | F <sub>IS</sub> range |               | Genetic diversity |
|---------------------------|------------------------------|----------|--------------|-----------------------|---------------|-------------------|
|                           | KNP                          |          | SE Australia | KNP                   | SE Australia  |                   |
|                           | Elevation                    | Distance | Distance     |                       |               |                   |
| <i>Astelia alpina</i>     | ns                           | s        | s            | 0.015 – 0.163         | 0.002 – 0.160 | High              |
| <i>Richea continentis</i> | s                            | ns       | s            | 0.181 – 0.405         | 0.192 – 0.418 | Low               |
| <i>Epacris paludosa</i>   | ns                           | ns       | s            | 0.288 – 0.351         | 0.182 – 0.338 | Low               |

Table S6. Interim Biogeographic Regionalisation for Australia (IBRA) bioregions and climatic variables used to delimit current and last glacial maximum study areas for three focal species: *Astelia alpina*, *Richea continentis* and *Epacris paludosa*. Mean and standard deviation (SD) of monthly temperature and precipitation variables were calculated.

| Species                   | IBRA bioregions                  | Mean daily temperature<br>range (tas; °C) |           | Monthly precipitation<br>amount range<br>(pr; kg m <sup>-2</sup> month <sup>-1</sup> ) |           |
|---------------------------|----------------------------------|-------------------------------------------|-----------|----------------------------------------------------------------------------------------|-----------|
|                           |                                  | Mean                                      | SD        | Mean                                                                                   | SD        |
| <i>Astelia alpina</i>     | Australian Alps (AUA)            |                                           |           |                                                                                        |           |
|                           | Ben Lomond (BEL)                 |                                           |           |                                                                                        |           |
|                           | Tasmania Central Highlands (TCH) | 1.9 – 13.2                                | 1.5 – 5.6 | 4.7 – 26.2                                                                             | 0.7 – 6.7 |
|                           | Tasmania Southern Ranges (TSR)   |                                           |           |                                                                                        |           |
|                           | Tasmania West (TWE)              |                                           |           |                                                                                        |           |
| <i>Richea continentis</i> | Australian Alps (AUA)            |                                           |           |                                                                                        |           |
|                           | South East Corner (SEC)          | 2.8 – 16.4                                | 2.3 – 5.9 | 3.8 – 15.5                                                                             | 0.7 – 5.3 |
|                           | South Eastern Highlands (SHE)    |                                           |           |                                                                                        |           |
| <i>Epacris paludosa</i>   | Australian Alps (AUA)            |                                           |           |                                                                                        |           |
|                           | Furneaux (FUR)                   |                                           |           |                                                                                        |           |
|                           | NSW North Coast (NNC)            |                                           |           |                                                                                        |           |
|                           | South East Corner (SEC)          | 2.8 – 20.0                                | 2.1 – 5.9 | 3.8 – 18.5                                                                             | 0.6 – 7.4 |
|                           | South Eastern Highlands (SHE)    |                                           |           |                                                                                        |           |
|                           | Sydney Basin (SYB)               |                                           |           |                                                                                        |           |
|                           | Tasmania Northern Slopes (TNS)   |                                           |           |                                                                                        |           |

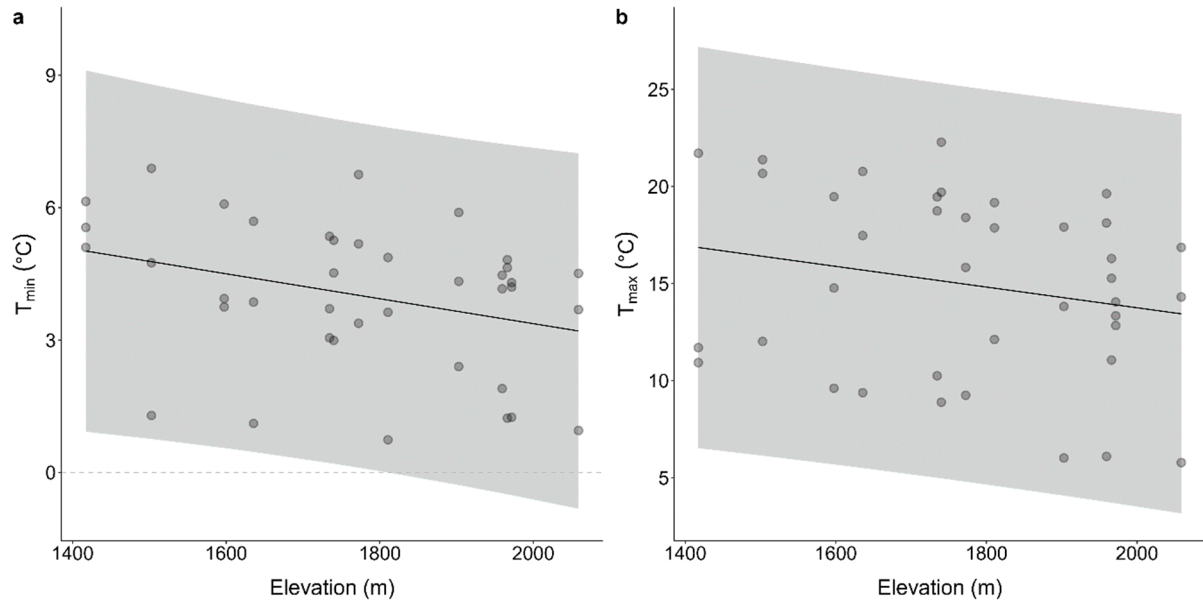

Figure S1. The relationship between elevation and ambient air temperature parameters: (a) mean minimum temperature ( $T_{\min}$ ) and (b) mean maximum temperature ( $T_{\max}$ ). Daily mean maximum and mean minimum temperatures were extracted from mean temperatures recorded every minute from a proceeding sampling frequency of five seconds. Ambient air temperature was measured over three consecutive days during the austral summer along three elevation gradients in Kosciuszko National Park, NSW. Circles represent observed daily mean maximum and mean minimum temperatures over the continuous recording period, with colours representing different temperature logging stations established along the gradients. The regression lines and confidence intervals are the predictions of the linear mixed model accounting for date as a random factor. Solid regression lines indicate that there was a significant relationship between elevation and air temperature and the grey ribbons represent 95% confidence intervals.

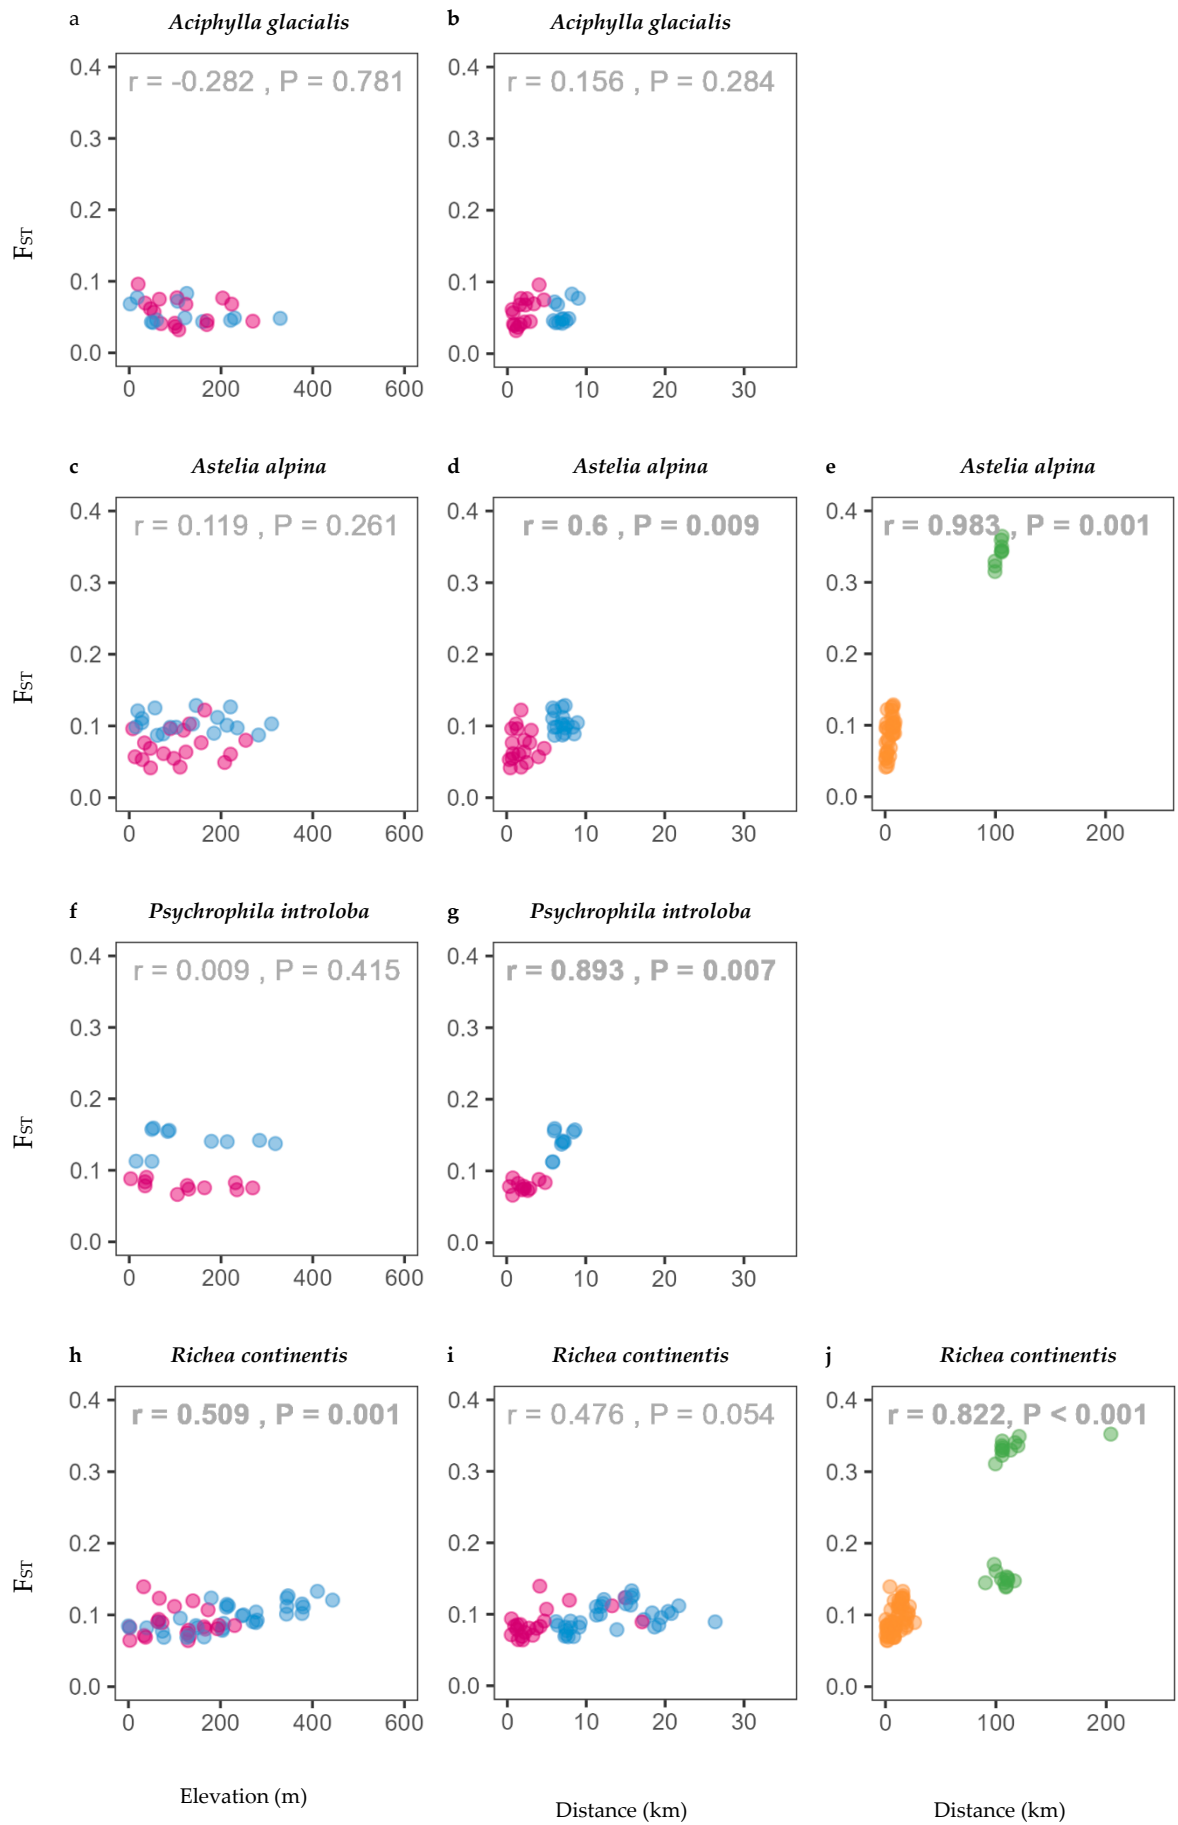



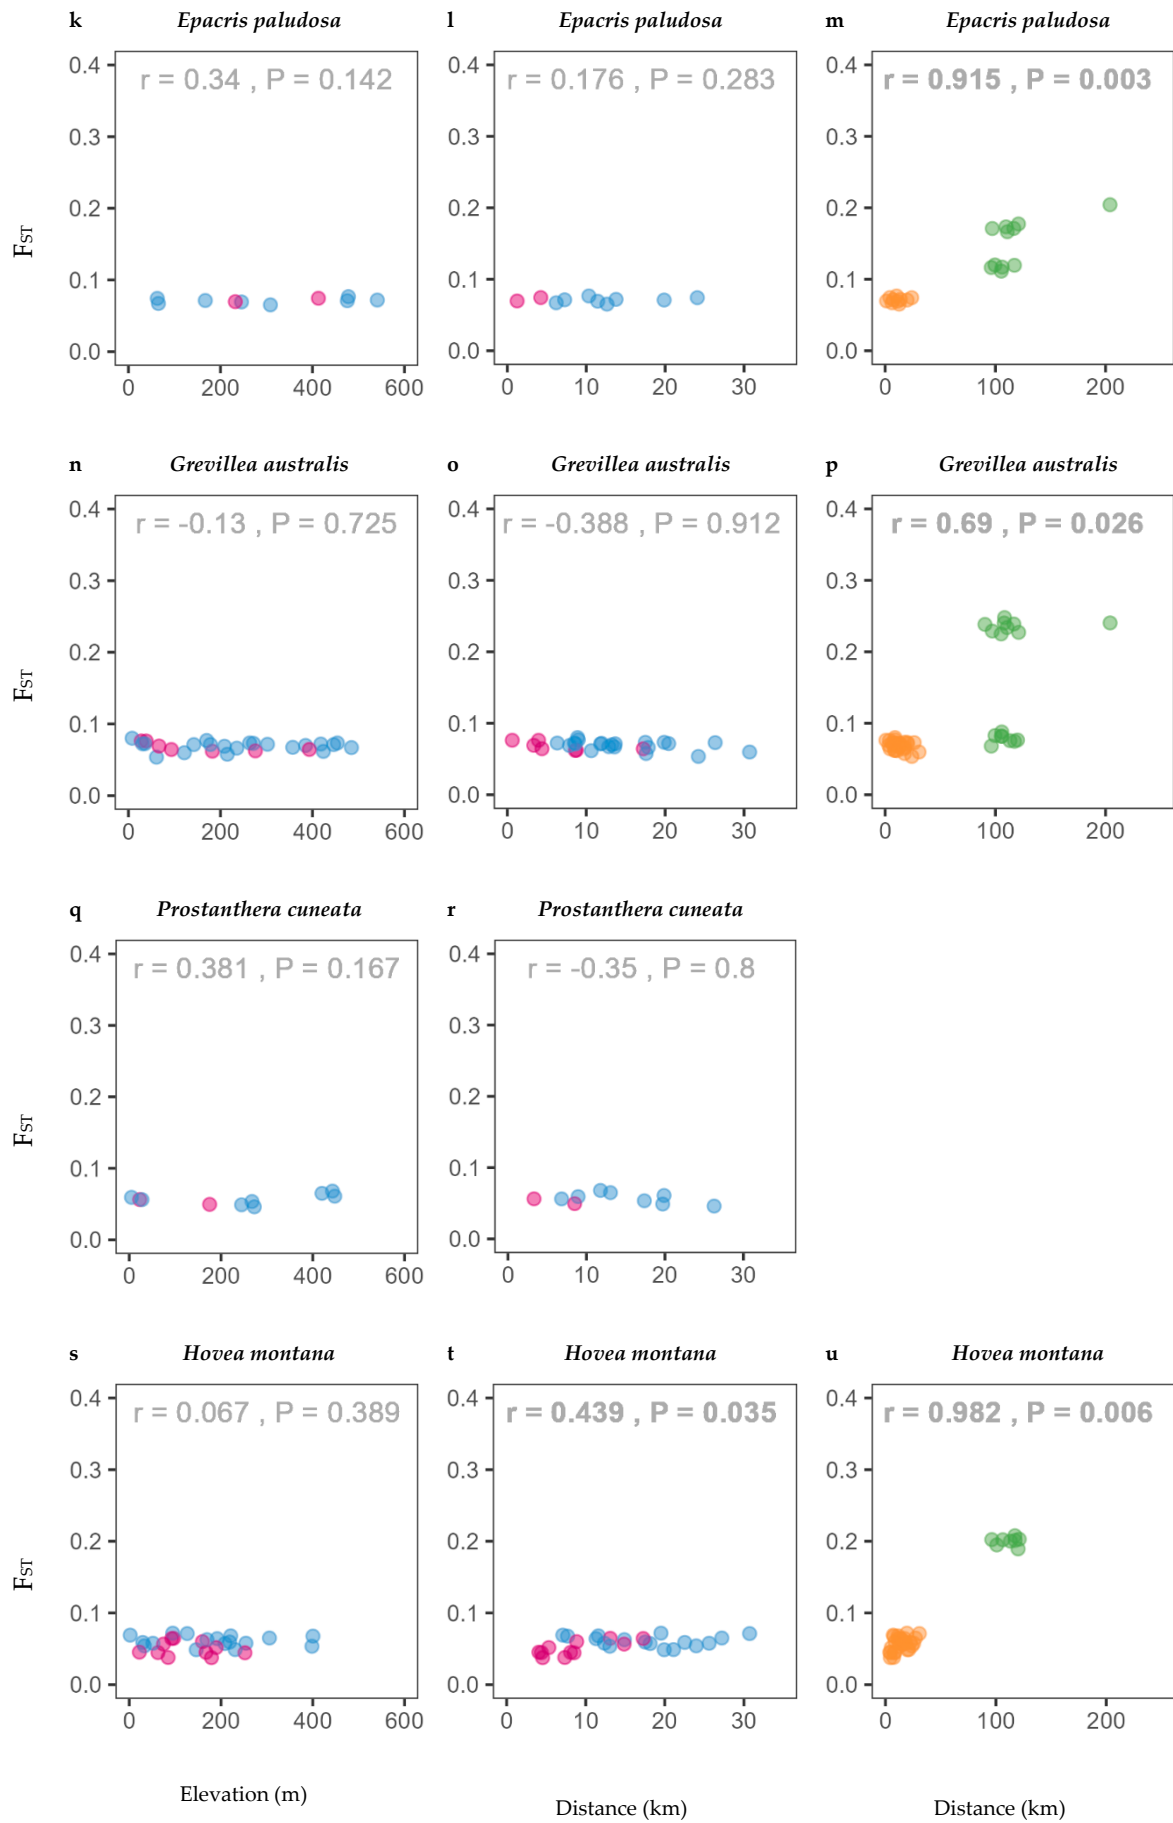

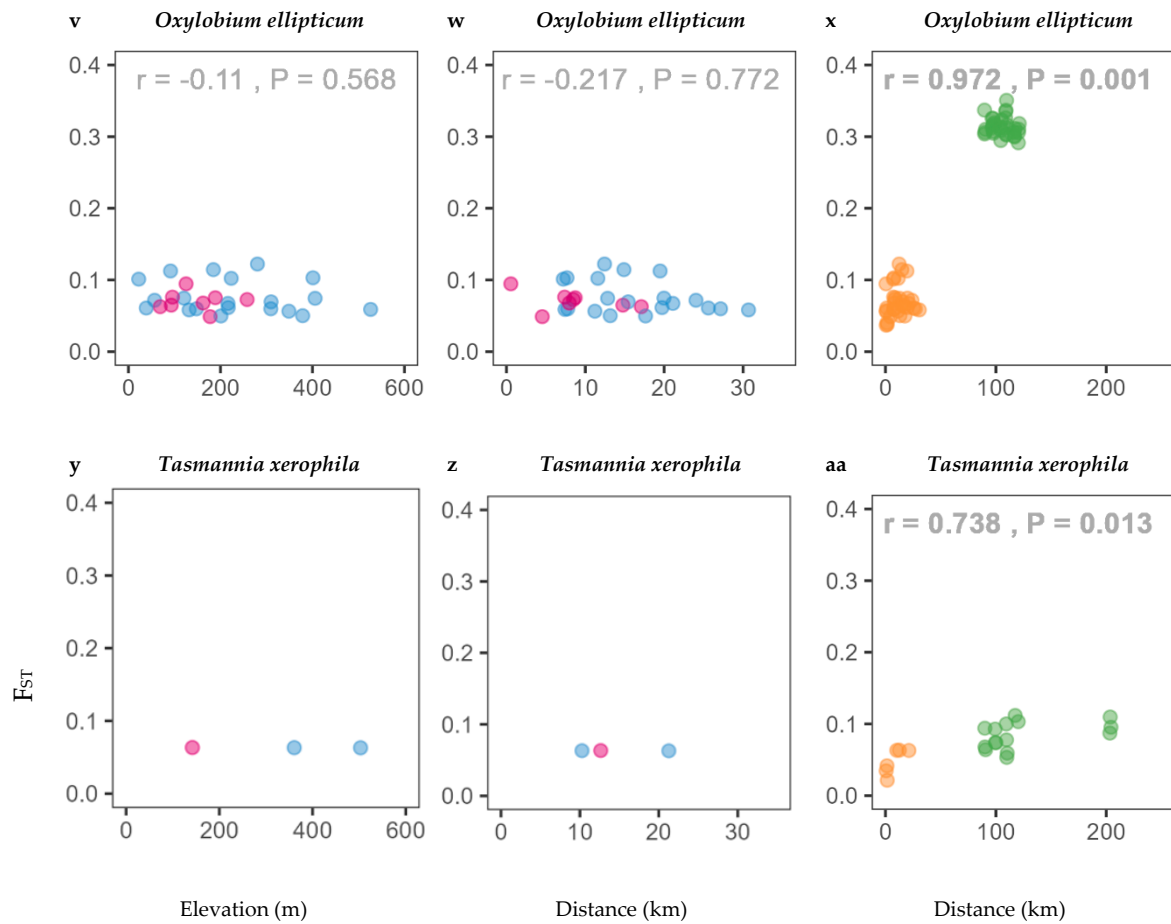

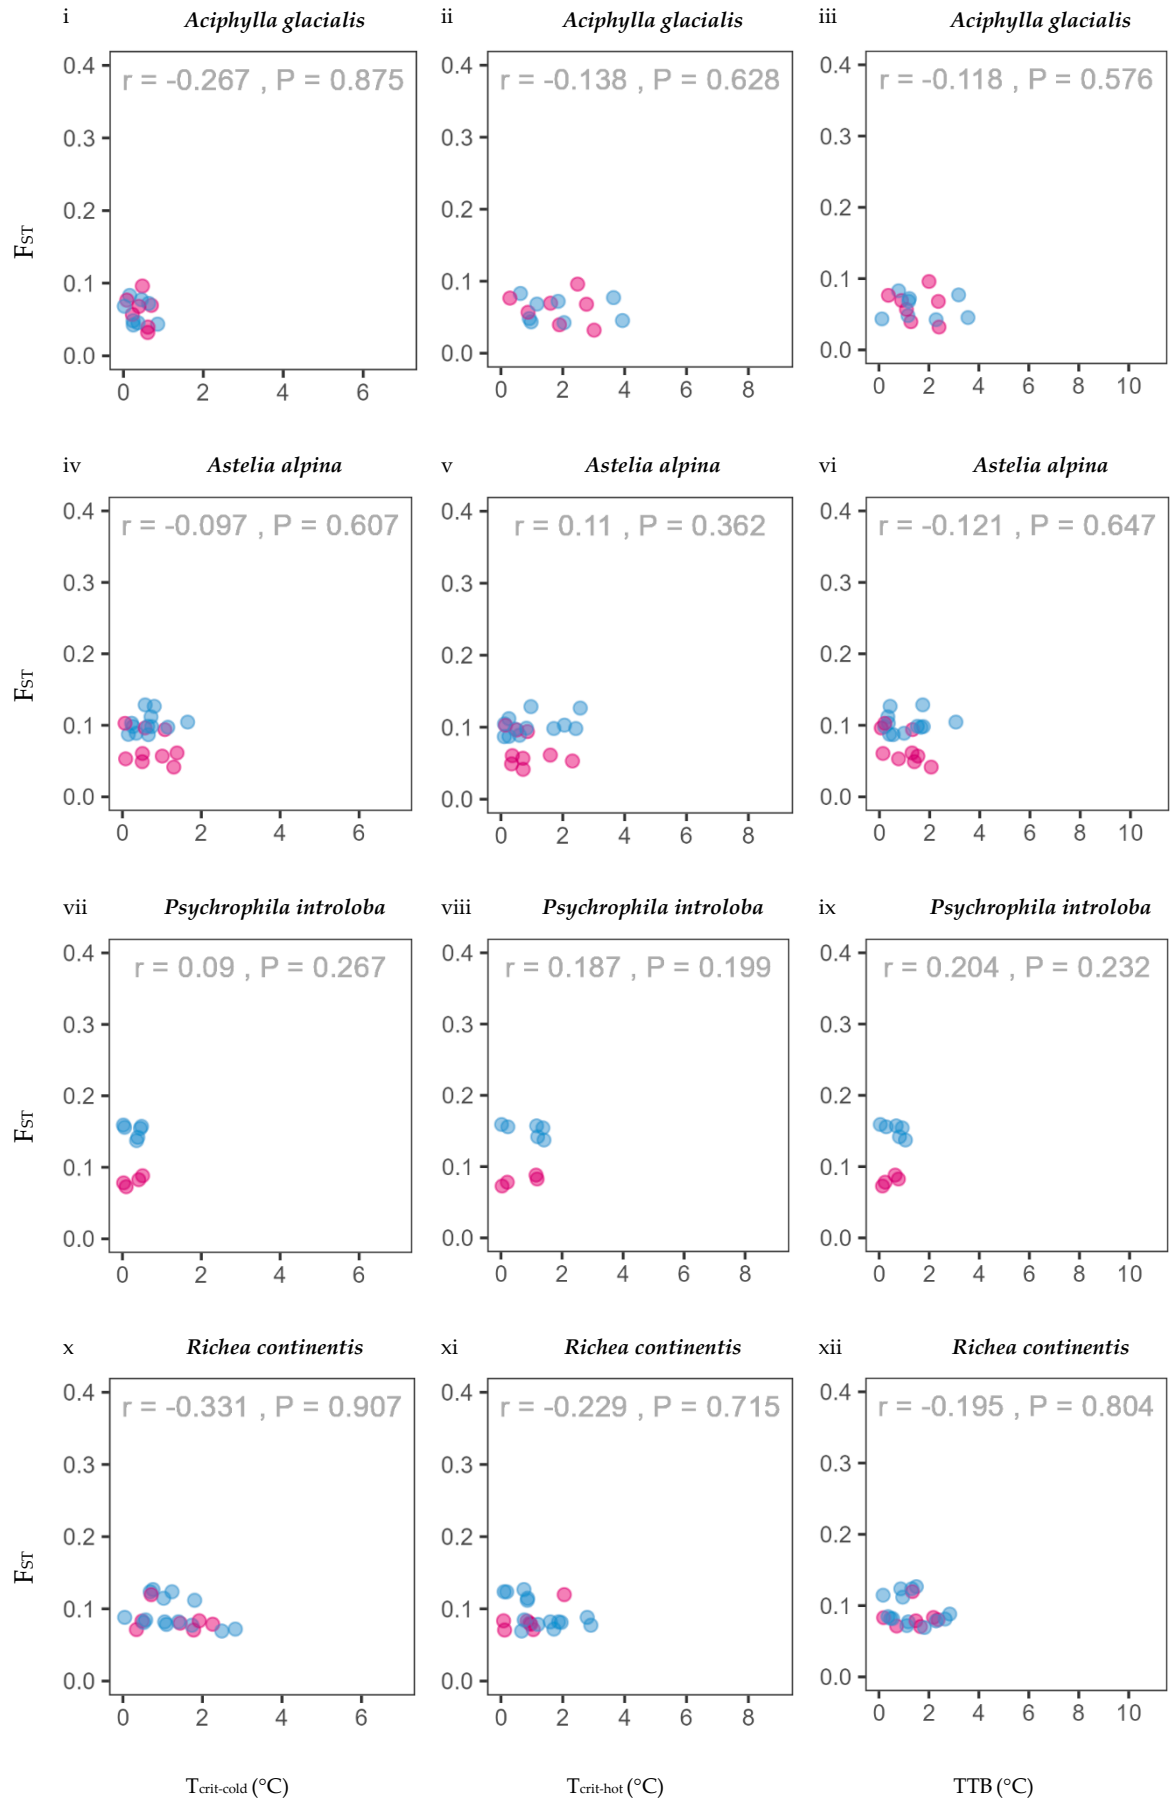

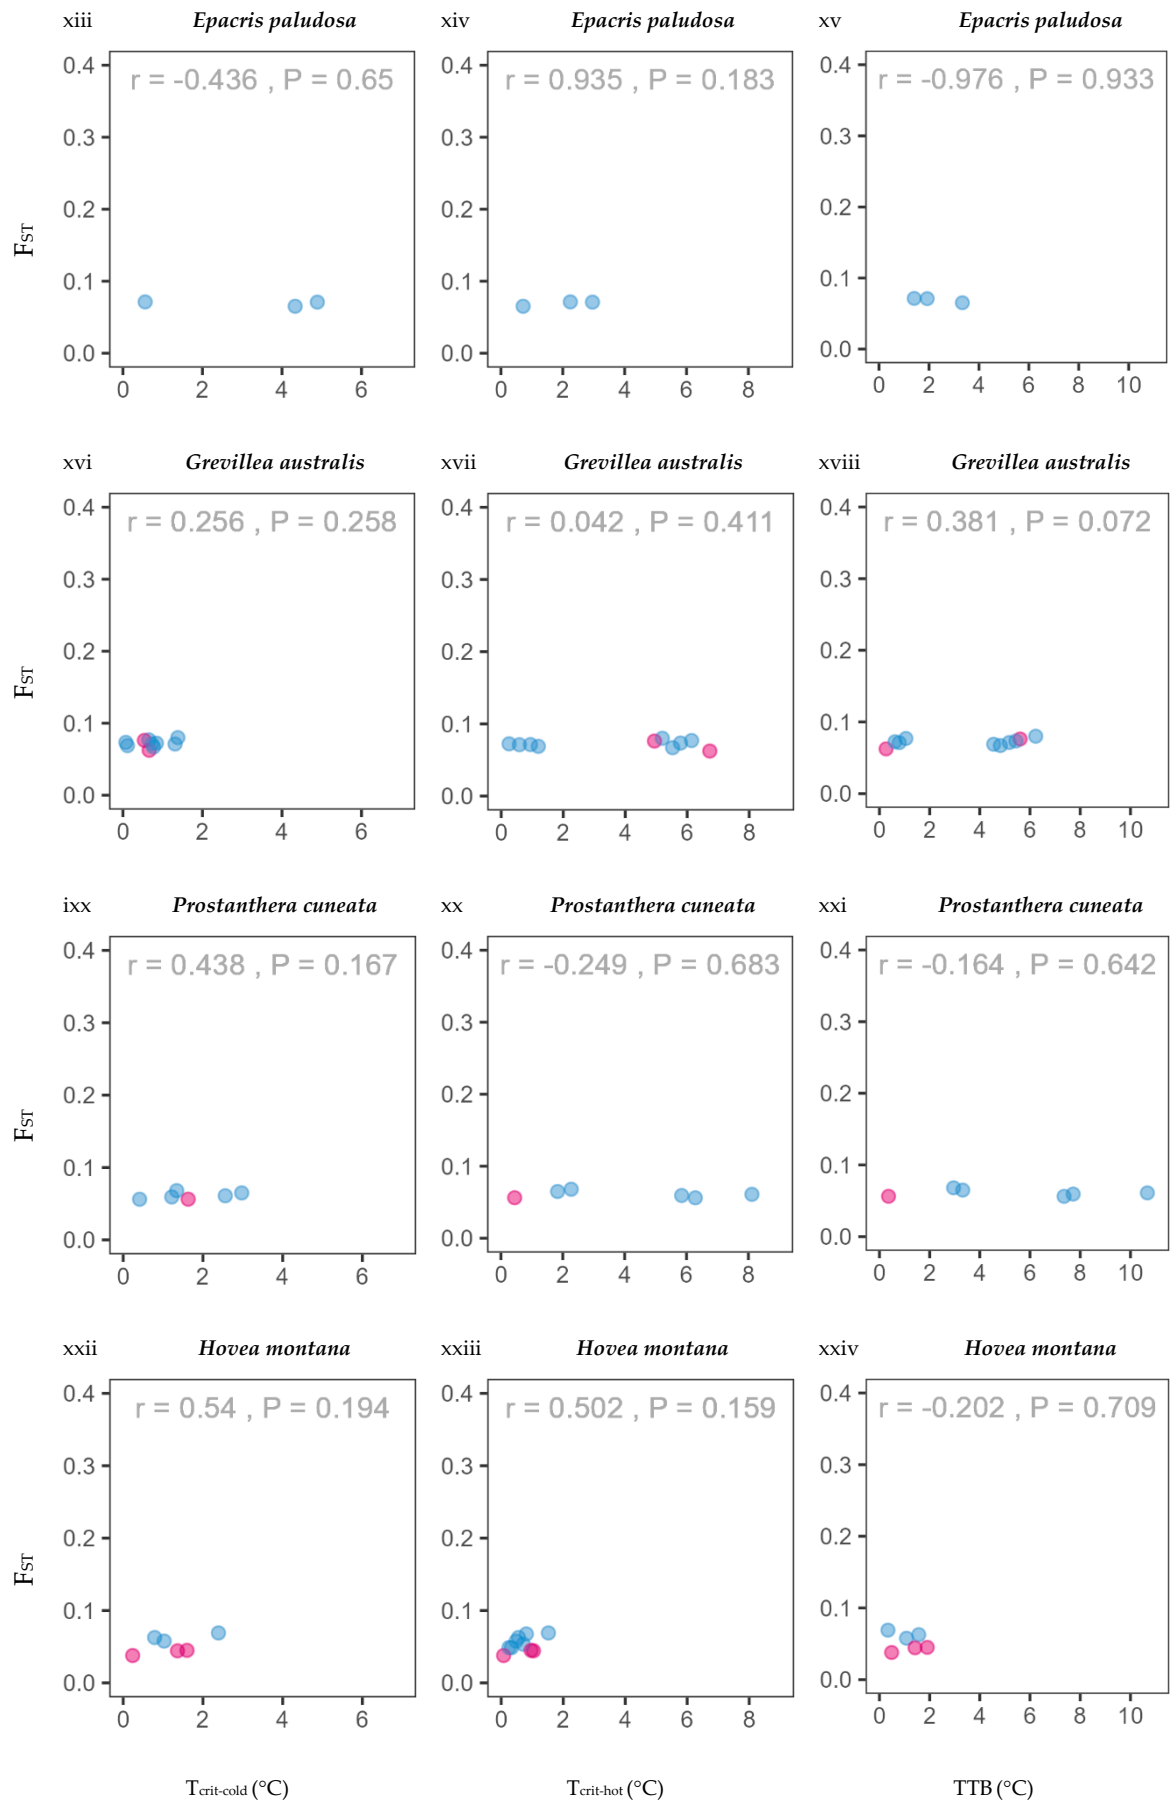

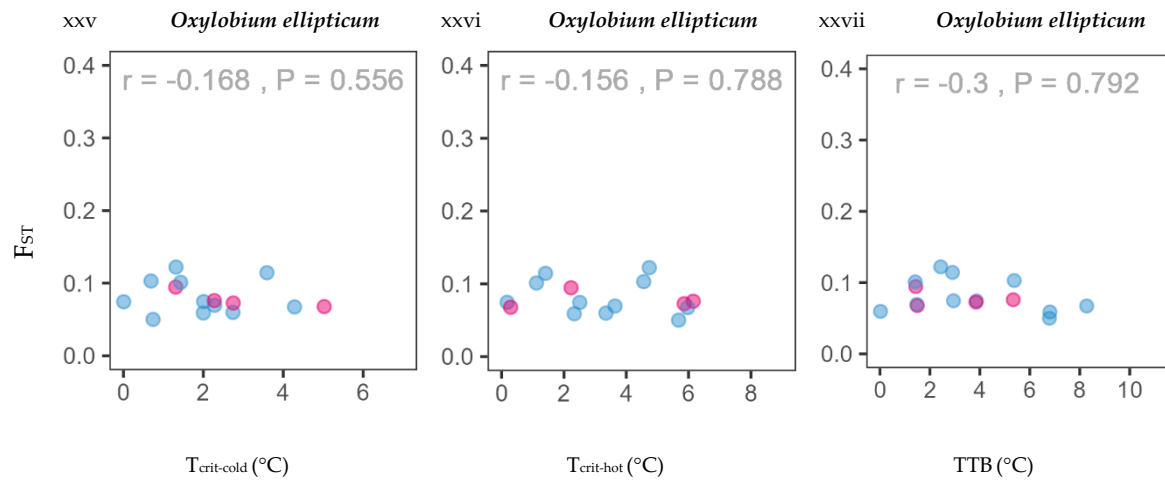

Figure S3. Isolation-by-distance plots comparing genetic differentiation ( $F_{ST}$ ) of nine alpine plant species with cold thresholds ( $T_{crit-cold}$ : left panels), heat thresholds ( $T_{crit-hot}$ : middle panels), and thermal tolerance breadth (TTB: right panels) averaged per population in Kosciuszko National Park. The coloured symbols represent within and between transect pairwise comparisons of sites (pink for within transects and blue for between transects). The study transects are Charlotte Pass, Perisher and Thredbo. Only one paired site for *Tasmannia xerophila* (not analysed).

Table S7. Genetic diversity measures of ten alpine plant species from populations within Kosciuszko National Park (KNP) and representative populations across regions of south-eastern Australia in Namadgi National Park (ACT) and Alpine National Park (VIC). Genetic diversity measures are allelic richness ( $ar$ ), expected heterozygosity ( $H_e$ ), observed heterozygosity ( $H_o$ ) and inbreeding coefficient ( $F_{is}$ ). Sampling sites are ordered in ascending order of elevation within regions.

| Species                    | Site                            | Latitude | Longitude | Elevation | $ar$              | $H_e$             | $H_o$             | $F_{is}$          |
|----------------------------|---------------------------------|----------|-----------|-----------|-------------------|-------------------|-------------------|-------------------|
| <i>Aciphylla glacialis</i> | <b>KNP</b>                      |          |           |           |                   |                   |                   |                   |
|                            | Snowy River                     | -36.4291 | 148.3209  | 1738      | 1.595             | 0.223             | 0.193             | 0.093             |
|                            | Snowy River 2                   | -36.4238 | 148.3153  | 1838      | 1.588             | 0.219             | 0.186             | 0.106             |
|                            | Charlotte pass carpark          | -36.4361 | 148.3252  | 1907      | 1.595             | 0.222             | 0.183             | 0.125             |
|                            | Blue lake lookout               | -36.4103 | 148.3058  | 1942      | 1.554             | 0.212             | 0.191             | 0.071             |
|                            | Thredbo River                   | -36.4890 | 148.2839  | 1959      | 1.593             | 0.22              | 0.184             | 0.117             |
|                            | Stillwell snow patch            | -36.4426 | 148.3256  | 1961      | 1.562             | 0.214             | 0.189             | 0.087             |
|                            | Wrights Creek                   | -36.4475 | 148.3288  | 2007      | 1.592             | 0.221             | 0.187             | 0.108             |
|                            | Kosciusko lookout               | -36.4803 | 148.2780  | 2067      | 1.571             | 0.221             | 0.169             | 0.177             |
|                            | <b>Mean <math>\pm</math> SE</b> |          |           |           | 1.581 $\pm$ 0.006 | 0.219 $\pm$ 0.001 | 0.185 $\pm$ 0.003 | 0.111 $\pm$ 0.011 |
| <i>Astelia alpina</i>      | <b>KNP</b>                      |          |           |           |                   |                   |                   |                   |
|                            | Snowy River                     | -36.4291 | 148.3209  | 1739      | 1.591             | 0.241             | 0.229             | 0.027             |
|                            | Charlotte pass carpark          | -36.4320 | 148.3273  | 1828      | 1.546             | 0.224             | 0.217             | 0.016             |
|                            | Snowy River 2                   | -36.4245 | 148.3155  | 1836      | 1.584             | 0.236             | 0.226             | 0.022             |
|                            | Blue lake lookout               | -36.4100 | 148.3058  | 1947      | 1.593             | 0.24              | 0.224             | 0.045             |
|                            | Stillwell snow patch            | -36.4426 | 148.3257  | 1960      | 1.556             | 0.235             | 0.204             | 0.095             |
|                            | Thredbo River                   | -36.4883 | 148.2834  | 1974      | 1.604             | 0.256             | 0.205             | 0.16              |
|                            | Wrights Creek                   | -36.4483 | 148.3292  | 1993      | 1.538             | 0.225             | 0.19              | 0.12              |
|                            | Kosciusko walk                  | -36.4843 | 148.2819  | 2020      | 1.628             | 0.256             | 0.236             | 0.052             |
|                            | Kosciusko lookout               | -36.4820 | 148.2794  | 2049      | 1.617             | 0.253             | 0.246             | 0.014             |
| <i>Epacris paludosa</i>    | <b>VIC</b>                      |          |           |           |                   |                   |                   |                   |
|                            | Cope Hut site                   | -36.9082 | 147.2976  | 1654      | 1.523             | 0.225             | 0.224             | 0.002             |
|                            | <b>Mean <math>\pm</math> SE</b> |          |           |           | 1.578 $\pm$ 0.011 | 0.239 $\pm$ 0.004 | 0.220 $\pm$ 0.005 | 0.055 $\pm$ 0.017 |
|                            | <b>KNP</b>                      |          |           |           |                   |                   |                   |                   |
|                            | Munyang                         | -36.3380 | 148.4021  | 1488      | 1.318             | 0.143             | 0.087             | 0.3               |
|                            | Cascade trail                   | -36.5233 | 148.2643  | 1545      | 1.31              | 0.141             | 0.085             | 0.295             |
|                            | Geehi                           | -36.2641 | 148.3740  | 1684      | 1.286             | 0.136             | 0.08              | 0.314             |
|                            | Stillwell snow patch            | -36.4425 | 148.3252  | 1755      | 1.278             | 0.133             | 0.073             | 0.338             |
|                            | Charlottes Pass Ski Hill        | -36.4357 | 148.3305  | 1794      | 1.316             | 0.143             | 0.088             | 0.286             |
|                            | Thredbo River                   | -36.4890 | 148.2839  | 1961      | 1.307             | 0.141             | 0.079             | 0.334             |
| <i>Epacris paludosa</i>    | Wrights Creek                   | -36.4466 | 148.3286  | 2026      | 1.327             | 0.145             | 0.087             | 0.305             |
|                            | <b>VIC</b>                      |          |           |           |                   |                   |                   |                   |
|                            | Cope Hut site                   | -36.9081 | 147.2977  | 1666      | 1.301             | 0.132             | 0.093             | 0.222             |
|                            | <b>ACT</b>                      |          |           |           |                   |                   |                   |                   |
|                            | Ginini Flats                    | -35.5214 | 148.7842  | 1598      | 1.479             | 0.207             | 0.161             | 0.182             |

| Species                     | Site                            | Latitude | Longitude | Elevation | $\bar{a}r$        | $H_e$             | $H_o$             | $F_{is}$          |
|-----------------------------|---------------------------------|----------|-----------|-----------|-------------------|-------------------|-------------------|-------------------|
|                             | <b>Mean <math>\pm</math> SE</b> |          |           |           | 1.325 $\pm$ 0.020 | 0.147 $\pm$ 0.008 | 0.093 $\pm$ 0.009 | 0.286 $\pm$ 0.017 |
| <i>Grevillea australis</i>  | <b>KNP</b>                      |          |           |           |                   |                   |                   |                   |
|                             | Munyang                         | -36.3380 | 148.4023  | 1332      | 1.372             | 0.175             | 0.101             | 0.331             |
|                             | Cascade trail                   | -36.5253 | 148.2649  | 1566      | 1.415             | 0.178             | 0.128             | 0.205             |
|                             | Rainbow lake                    | -36.3700 | 148.4755  | 1621      | 1.277             | 0.142             | 0.091             | 0.28              |
|                             | Geehi                           | -36.2640 | 148.3746  | 1688      | 1.351             | 0.168             | 0.102             | 0.3               |
|                             | Porcupine rocks                 | -36.4166 | 148.4070  | 1782      | 1.348             | 0.167             | 0.103             | 0.293             |
|                             | Charlottes Pass Ski Hill        | -36.4355 | 148.3312  | 1787      | 1.352             | 0.153             | 0.113             | 0.172             |
|                             | Snowy River 2                   | -36.4160 | 148.3109  | 1925      | 1.357             | 0.157             | 0.109             | 0.217             |
|                             | Blue lake lookout               | -36.4114 | 148.3071  | 1951      | 1.352             | 0.162             | 0.098             | 0.311             |
|                             | Thredbo River                   | -36.4892 | 148.2842  | 1959      | 1.332             | 0.168             | 0.098             | 0.332             |
|                             | Stillwell snow patch            | -36.4434 | 148.3260  | 1989      | 1.379             | 0.168             | 0.108             | 0.273             |
|                             | <b>VIC</b>                      |          |           |           |                   |                   |                   |                   |
|                             | Cope Hut Site                   | -36.9088 | 147.2974  | 1676      | 1.378             | 0.172             | 0.113             | 0.263             |
|                             | <b>ACT</b>                      |          |           |           |                   |                   |                   |                   |
|                             | Ginini Flats                    | -35.5214 | 148.7842  | 1598      | 1.359             | 0.169             | 0.136             | 0.171             |
|                             | <b>Mean <math>\pm</math> SE</b> |          |           |           | 1.356 $\pm$ 0.009 | 0.165 $\pm$ 0.003 | 0.108 $\pm$ 0.004 | 0.262 $\pm$ 0.017 |
| <i>Hovea montana</i>        | <b>KNP</b>                      |          |           |           |                   |                   |                   |                   |
|                             | Meritts nature trail            | -36.5022 | 148.3068  | 1386      | 1.458             | 0.198             | 0.154             | 0.16              |
|                             | Munyang                         | -36.3405 | 148.4021  | 1532      | 1.457             | 0.192             | 0.144             | 0.177             |
|                             | Cascade trail                   | -36.5255 | 148.2650  | 1565      | 1.442             | 0.19              | 0.143             | 0.177             |
|                             | Aqueduct Track                  | -36.3729 | 148.4302  | 1594      | 1.41              | 0.189             | 0.12              | 0.275             |
|                             | Rainbow lake                    | -36.3699 | 148.4756  | 1616      | 1.447             | 0.196             | 0.142             | 0.203             |
|                             | Geehi                           | -36.2640 | 148.3747  | 1690      | 1.424             | 0.184             | 0.141             | 0.163             |
|                             | Porcupine rocks                 | -36.4170 | 148.4068  | 1784      | 1.447             | 0.192             | 0.143             | 0.182             |
|                             | Charlottes Pass Ski Hill        | -36.4356 | 148.3311  | 1787      | 1.415             | 0.188             | 0.145             | 0.166             |
|                             | Charlotte pass carpark          | -36.4346 | 148.3266  | 1883      | 1.406             | 0.181             | 0.138             | 0.168             |
|                             | <b>VIC</b>                      |          |           |           |                   |                   |                   |                   |
|                             | Cope Hut Site                   | -36.9090 | 147.2971  | 1665      | 1.36              | 0.169             | 0.124             | 0.213             |
|                             | <b>Mean <math>\pm</math> SE</b> |          |           |           | 1.427 $\pm$ 0.010 | 0.188 $\pm$ 0.003 | 0.139 $\pm$ 0.003 | 0.188 $\pm$ 0.011 |
| <i>Oxylobium ellipticum</i> | <b>KNP</b>                      |          |           |           |                   |                   |                   |                   |
|                             | Meritts nature trail            | -36.5020 | 148.3066  | 1394      | 1.366             | 0.17              | 0.123             | 0.216             |
|                             | Munyang                         | -36.3399 | 148.4021  | 1515      | 1.355             | 0.166             | 0.118             | 0.231             |
|                             | Cascade trail                   | -36.5253 | 148.2648  | 1568      | 1.359             | 0.161             | 0.129             | 0.144             |
|                             | Rainbow lake                    | -36.3699 | 148.4755  | 1610      | 1.328             | 0.163             | 0.093             | 0.355             |
|                             | Geehi                           | -36.2645 | 148.3756  | 1704      | 1.351             | 0.167             | 0.101             | 0.319             |
|                             | Porcupine rocks                 | -36.4162 | 148.4073  | 1776      | 1.337             | 0.161             | 0.107             | 0.264             |
|                             | Charlottes Pass Ski Hill        | -36.4359 | 148.3308  | 1795      | 1.3               | 0.143             | 0.095             | 0.257             |
|                             | Charlotte pass carpark          | -36.4369 | 148.3247  | 1920      | 1.348             | 0.163             | 0.105             | 0.28              |
|                             | <b>ACT</b>                      |          |           |           |                   |                   |                   |                   |

| Species                       | Site                     | Latitude | Longitude | Elevation | $\bar{a}$         | $H_e$             | $H_o$             | $F_{is}$          |
|-------------------------------|--------------------------|----------|-----------|-----------|-------------------|-------------------|-------------------|-------------------|
| <i>Prostanthera cuneata</i>   | Mt Franklin Rd 3         | -35.5042 | 148.7622  | 1541      | 1.283             | 0.139             | 0.088             | 0.282             |
|                               | Ginini Flats             | -35.5214 | 148.7842  | 1598      | 1.348             | 0.163             | 0.091             | 0.369             |
|                               | Mt Franklin Rd 1         | -35.5201 | 148.7659  | 1637      | 1.354             | 0.172             | 0.097             | 0.376             |
|                               | Mt Franklin Road 2       | -35.5251 | 148.7719  | 1666      | 1.299             | 0.148             | 0.088             | 0.332             |
|                               | Upper Ginini Flats       | -35.5265 | 148.7793  | 1670      | 1.359             | 0.17              | 0.101             | 0.334             |
|                               | Mean $\pm$ SE            |          |           |           | 1.337 $\pm$ 0.007 | 0.160 $\pm$ 0.003 | 0.103 $\pm$ 0.004 | 0.289 $\pm$ 0.019 |
|                               | KNP                      |          |           |           |                   |                   |                   |                   |
|                               | Munyang                  | -36.3378 | 148.4015  | 1506      | 1.385             | 0.159             | 0.154             | -0.005            |
|                               | Geehi                    | -36.2648 | 148.3738  | 1681      | 1.431             | 0.18              | 0.163             | 0.053             |
|                               | Porcupine rocks          | -36.4157 | 148.4075  | 1773      | 1.335             | 0.153             | 0.122             | 0.12              |
| <i>Psychrophila introloba</i> | Charlottes Pass Ski Hill | -36.4354 | 148.3311  | 1789      | 1.356             | 0.152             | 0.137             | 0.042             |
|                               | Snowy River 2            | -36.4189 | 148.3129  | 1894      | 1.374             | 0.154             | 0.151             | -0.015            |
|                               | Charlotte pass carpark   | -36.4371 | 148.3247  | 1924      | 1.35              | 0.155             | 0.115             | 0.179             |
|                               | Blue lake lookout        | -36.4113 | 148.3068  | 1949      | 1.371             | 0.154             | 0.139             | 0.054             |
|                               | Thredbo River            | -36.4895 | 148.2841  | 1953      | 1.374             | 0.158             | 0.138             | 0.065             |
|                               | Stilwell snow patch      | -36.4433 | 148.3259  | 1988      | 1.377             | 0.163             | 0.142             | 0.07              |
|                               | Mean $\pm$ SE            |          |           |           | 1.373 $\pm$ 0.009 | 0.159 $\pm$ 0.003 | 0.140 $\pm$ 0.005 | 0.063 $\pm$ 0.020 |
|                               | KNP                      |          |           |           |                   |                   |                   |                   |
|                               | Snowy River              | -36.4294 | 148.3214  | 1726      | 1.4               | 0.16              | 0.103             | 0.267             |
|                               | Snowy River 2            | -36.4245 | 148.3155  | 1833      | 1.38              | 0.152             | 0.103             | 0.229             |
| <i>Richea continentis</i>     | Stilwell snow patch      | -36.4422 | 148.3253  | 1959      | 1.353             | 0.148             | 0.089             | 0.307             |
|                               | Blue lake lookout        | -36.4090 | 148.3056  | 1962      | 1.368             | 0.149             | 0.091             | 0.297             |
|                               | Wrights Creek            | -36.4484 | 148.3294  | 1996      | 1.458             | 0.178             | 0.133             | 0.182             |
|                               | Kosciusko walk           | -36.4842 | 148.2820  | 2011      | 1.439             | 0.181             | 0.119             | 0.267             |
|                               | Kosciusko lookout        | -36.4818 | 148.2793  | 2045      | 1.44              | 0.18              | 0.12              | 0.262             |
|                               | Mean $\pm$ SE            |          |           |           | 1.405 $\pm$ 0.015 | 0.164 $\pm$ 0.006 | 0.108 $\pm$ 0.006 | 0.259 $\pm$ 0.016 |
|                               | KNP                      |          |           |           |                   |                   |                   |                   |
|                               | Aqueduct Track           | -36.3739 | 148.4306  | 1584      | 1.323             | 0.146             | 0.097             | 0.251             |
|                               | Rainbow lake             | -36.3701 | 148.4762  | 1617      | 1.269             | 0.13              | 0.07              | 0.363             |
|                               | Geehi                    | -36.2638 | 148.3742  | 1684      | 1.293             | 0.138             | 0.077             | 0.339             |
| <i>Richea continentis</i>     | Porcupine rocks          | -36.4146 | 148.4083  | 1757      | 1.282             | 0.133             | 0.075             | 0.325             |
|                               | Charlottes Pass Ski Hill | -36.4356 | 148.3306  | 1796      | 1.307             | 0.141             | 0.085             | 0.289             |
|                               | Charlotte pass carpark   | -36.4321 | 148.3273  | 1831      | 1.302             | 0.142             | 0.08              | 0.337             |
|                               | Snowy River 2            | -36.4245 | 148.3154  | 1834      | 1.354             | 0.161             | 0.101             | 0.281             |
|                               | Stillwell snow patch     | -36.4427 | 148.3258  | 1961      | 1.336             | 0.151             | 0.101             | 0.244             |
|                               | Thredbo River            | -36.4889 | 148.2838  | 1961      | 1.302             | 0.146             | 0.085             | 0.317             |
|                               | Blue lake lookout        | -36.4091 | 148.3055  | 1964      | 1.354             | 0.153             | 0.111             | 0.192             |
|                               | Wrights Creek            | -36.4468 | 148.3285  | 2027      | 1.305             | 0.154             | 0.075             | 0.418             |
|                               | Kosciusko lookout        | -36.4819 | 148.2793  | 2040      | 1.268             | 0.131             | 0.085             | 0.253             |
|                               | VIC                      |          |           |           |                   |                   |                   |                   |



| Species                   | Site                     | Latitude | Longitude | Elevation | $ar$          | $H_e$         | $H_o$         | $F_{is}$      |
|---------------------------|--------------------------|----------|-----------|-----------|---------------|---------------|---------------|---------------|
| <i>Tasmania xerophila</i> | Cope Hut site            | -36.9082 | 147.2977  | 1651      | 1.243         | 0.118         | 0.081         | 0.256         |
|                           | <b>ACT</b>               |          |           |           |               |               |               |               |
|                           | Ginini Flats             | -35.5214 | 148.7842  | 1598      | 1.356         | 0.155         | 0.111         | 0.217         |
|                           | <b>Mean ± SE</b>         |          |           |           | 1.307 ± 0.009 | 0.143 ± 0.003 | 0.088 ± 0.004 | 0.292 ± 0.016 |
|                           | <b>KNP</b>               |          |           |           |               |               |               |               |
|                           | Ngarigo campground       | -36.4580 | 148.3858  | 1237      | 1.444         | 0.198         | 0.144         | 0.208         |
|                           | Cascade trail            | -36.5228 | 148.2643  | 1544      | 1.379         | 0.177         | 0.127         | 0.206         |
|                           | Aqueduct Track           | -36.3729 | 148.4301  | 1596      | 1.42          | 0.19          | 0.136         | 0.215         |
|                           | Charlottes Pass Ski Hill | -36.4361 | 148.3309  | 1740      | 1.446         | 0.189         | 0.171         | 0.049         |
|                           | Geehi                    | -36.2670 | 148.3792  | 1742      | 1.415         | 0.187         | 0.132         | 0.217         |
|                           | <b>VIC</b>               |          |           |           |               |               |               |               |
|                           | Cope Hut site            | -36.9090 | 147.2968  | 1664      | 1.442         | 0.21          | 0.138         | 0.278         |
|                           | <b>ACT</b>               |          |           |           |               |               |               |               |
|                           | Ginini Flats             | -35.5214 | 148.7842  | 1598      | 1.536         | 0.223         | 0.183         | 0.129         |
|                           | Mt Franklin Rd 1         | -35.5201 | 148.7659  | 1637      | 1.509         | 0.215         | 0.172         | 0.143         |
|                           | Upper Ginini Flats       | -35.5262 | 148.7797  | 1670      | 1.522         | 0.228         | 0.165         | 0.23          |
| <b>Mean ± SE</b>          |                          |          |           |           | 1.457 ± 0.018 | 0.202 ± 0.006 | 0.152 ± 0.007 | 0.186 ± 0.023 |

Table S8. Results of non-parametric spearman rank correlation test (p-values plus rho in parenthesis) on the relationship between genetic diversity measures and latitude, longitude and elevation within Kosciuszko National Park (KNP) and across south-eastern Australia. Genetic diversity measures are allelic richness ( $ar$ ), expected heterozygosity ( $H_e$ ), observed heterozygosity ( $H_o$ ) and inbreeding coefficient ( $F_{is}$ ). Bold values indicate significant relationships.

| Species                       | Sampling range | $ar$           |                           |                       | $H_e$                 |                       |                       | $H_o$                 |                       |                | $F_{is}$             |                           |                |
|-------------------------------|----------------|----------------|---------------------------|-----------------------|-----------------------|-----------------------|-----------------------|-----------------------|-----------------------|----------------|----------------------|---------------------------|----------------|
|                               |                | Latitude       | Longitude                 | Elevation             | Latitude              | Longitude             | Elevation             | Latitude              | Longitude             | Elevation      | Latitude             | Longitude                 | Elevation      |
| <i>Aciphylla glacialis</i>    | SE Australia   | --             | --                        | --                    | --                    | --                    | --                    | --                    | --                    | --             | --                   | --                        | --             |
|                               | KNP            | 0.629 (-0.204) | 0.629 (0.204)             | 0.257 (-0.455)        | 0.548 (-0.252)        | 0.713 (0.156)         | 0.629 (-0.204)        | 0.139 (0.571)         | 0.352 (0.381)         | 0.289 (-0.429) | 0.071 (-0.667)       | 0.493 (-0.286)            | 0.385 (0.357)  |
| <i>Astelia alpina</i>         | SE Australia   | 0.973 (-0.018) | 0.218 (-0.430)            | 0.066 (0.612)         | 0.589 (-0.195)        | 0.125 (-0.518)        | 0.120 (0.524)         | 0.920 (0.036)         | 0.059 (-0.614)        | 0.776 (0.103)  | 0.946 (-0.030)       | 0.247 (0.406)             | 0.204 (0.442)  |
|                               | KNP            | 0.291 (-0.400) | <b>&lt; 0.001 (-9.67)</b> | 0.213 (0.467)         | 0.160 (-0.510)        | <b>0.002 (-0.879)</b> | 0.242 (0.435)         | 0.982 (0.167)         | <b>0.031 (-0.733)</b> | 0.744 (0.133)  | 0.270 (-0.417)       | 0.644 (0.193)             | 0.552 (0.233)  |
| <i>Psychrophila introloba</i> | SE Australia   | --             | --                        | --                    | --                    | --                    | --                    | --                    | --                    | --             | --                   | --                        | --             |
|                               | KNP            | 0.119 (-0.642) | 0.819 (-0.107)            | 0.180 (0.571)         | <b>0.036 (-0.786)</b> | 0.294 (-0.464)        | 0.119 (0.643)         | 0.129 (-0.631)        | 0.788 (-0.126)        | 0.159 (0.595)  | 0.641 (0.216)        | 0.848 (-0.090)            | 0.670 (-0.198) |
| <i>Epacris paludosa</i>       | SE Australia   | 0.879 (-0.071) | 0.535 (0.286)             | 0.760 (0.143)         | 0.166 (0.504)         | 0.051 (0.664)         | 0.932 (0.034)         | 0.670 (0.198)         | 0.310 (0.450)         | 1.000 (0.000)  | 1.000 (0.000)        | 0.702 (-0.179)            | 0.589 (0.250)  |
|                               | KNP            | 0.410 (0.317)  | 0.162 (0.517)             | 0.776 (-0.117)        | 0.877 (-0.073)        | 0.554 (0.273)         | 0.527 (0.291)         | 0.683 (0.159)         | 0.472 (0.276)         | 0.458 (-0.285) | 0.880 (-0.067)       | 0.708 (-0.150)            | 0.230 (0.450)  |
| <i>Grevillea australis</i>    | SE Australia   | 0.313 (-0.319) | 0.212 (-0.389)            | 0.442 (-0.245)        | 0.554 (-0.190)        | 0.363 (-0.289)        | 0.103 (-0.493)        | 0.476 (-0.228)        | 0.688 (-0.130)        | 0.415 (-0.260) | 0.762 (0.098)        | 0.829 (-0.070)            | 0.485 (0.224)  |
|                               | KNP            | 0.413 (-0.292) | 0.192 (-0.450)            | 0.828 (-0.079)        | 0.506 (-0.239)        | 0.270 (-0.387)        | 0.506 (-0.239)        | 0.143 (-0.498)        | 0.336 (-0.340)        | 0.920 (-0.036) | 0.293 (0.370)        | 0.829 (0.079)             | 0.881 (0.055)  |
| <i>Hovea montana</i>          | SE Australia   | 0.424 (0.286)  | 0.424 (0.286)             | 0.062 (-0.608)        | 0.590 (0.195)         | 0.235 (0.413)         | 0.053 (-0.626)        | 0.776 (-0.103)        | 0.751 (-0.116)        | 0.393 (-0.304) | 0.947 (-0.024)       | 0.336 (0.340)             | 0.920 (-0.036) |
|                               | KNP            | 0.966 (0.017)  | 0.966 (0.017)             | <b>0.035 (-0.703)</b> | 0.781 (-0.109)        | 0.620 (0.192)         | <b>0.038 (-0.695)</b> | 0.262 (-0.418)        | 0.284 (-0.402)        | 0.306 (-0.385) | 0.529 (0.243)        | <b>0.032 (0.711)</b>      | 0.983 (0.008)  |
| <i>Oxylobium ellipticum</i>   | SE Australia   | 0.200 (0.753)  | 0.292 (-0.317)            | 0.266 (-0.333)        | 0.907 (0.036)         | 0.829 (0.066)         | 0.632 (-0.147)        | <b>0.004 (-0.744)</b> | <b>0.007 (-0.708)</b> | 0.667 (-0.132) | <b>0.003 (0.753)</b> | <b>&lt; 0.001 (0.830)</b> | 0.517 (0.198)  |
|                               | KNP            | 0.420 (-0.333) | 0.120 (-0.595)            | <b>0.037 (-0.738)</b> | 0.506 (0.277)         | 0.932 (-0.036)        | 0.143 (-0.566)        | 0.160 (-0.548)        | 0.102 (-0.619)        | 0.139 (-0.571) | 0.086 (0.643)        | 0.058 (0.690)             | 0.183 (0.524)  |
| <i>Prostanthera cuneata</i>   | SE Australia   | --             | --                        | --                    | --                    | --                    | --                    | --                    | --                    | --             | --                   | --                        | --             |
|                               | KNP            | 0.404 (0.318)  | 0.932 (0.033)             | 0.683 (-0.159)        | 0.764 (0.117)         | 0.949 (0.025)         | 0.932 (0.033)         | 0.125 (0.550)         | 0.765 (0.117)         | 0.406 (-0.317) | 0.244 (-0.433)       | 0.966 (-0.017)            | 0.244 (0.433)  |
| <i>Richea continentis</i>     | SE Australia   | 0.176 (0.383)  | 0.404 (0.242)             | 0.931 (0.025)         | 0.497 (0.198)         | 0.742 (0.097)         | 0.411 (0.239)         | 0.746 (0.095)         | 0.499 (-0.197)        | 0.737 (0.099)  | 0.852 (-0.055)       | 0.464 (0.213)             | 0.994 (0.002)  |
|                               | KNP            | 0.957 (0.018)  | 0.519 (-0.207)            | 0.675 (0.135)         | 0.463 (-0.235)        | 0.230 (-0.375)        | 0.200 (0.398)         | 0.645 (-0.148)        | 0.055 (-0.565)        | 0.316 (0.317)  | 0.746 (0.105)        | 0.138 (0.455)             | 0.449 (-0.242) |
| <i>Tasmannia xerophila</i>    | SE Australia   | 0.067 (0.633)  | <b>0.0246 (0.733)</b>     | 0.732 (0.133)         | 0.139 (0.533)         | <b>0.036 (0.700)</b>  | 0.932 (0.033)         | 0.077 (0.617)         | 0.067 (0.633)         | 0.765 (0.117)  | 0.433 (-0.300)       | 0.576 (-0.217)            | 0.668 (0.167)  |
|                               | KNP            | 0.873 (0.100)  | 0.624 (0.300)             | 1.000 (0.000)         | 0.873 (0.100)         | 0.104 (0.800)         | 0.505 (-0.400)        | 0.873 (0.100)         | 0.624 (0.300)         | 1.000 (0.000)  | 0.188 (0.700)        | 0.285 (0.600)             | 0.624 (0.300)  |

Table S9. Results of non-parametric spearman rank correlation test (p-values plus rho in parenthesis) on the relationship between genetic diversity measures and cold thresholds ( $T_{crit-cold}$ ), heat thresholds ( $T_{crit-hot}$ ), and thermal tolerance breadth (TTB) averaged per population in Kosciuszko National Park. Genetic diversity measures are allelic richness ( $ar$ ), expected heterozygosity ( $H_e$ ), observed heterozygosity ( $H_o$ ) and inbreeding coefficient ( $F_{is}$ ). Bold values indicate significant relationships. Only one paired site for *Tasmannia xerophila* (not analysed).

[illegible]

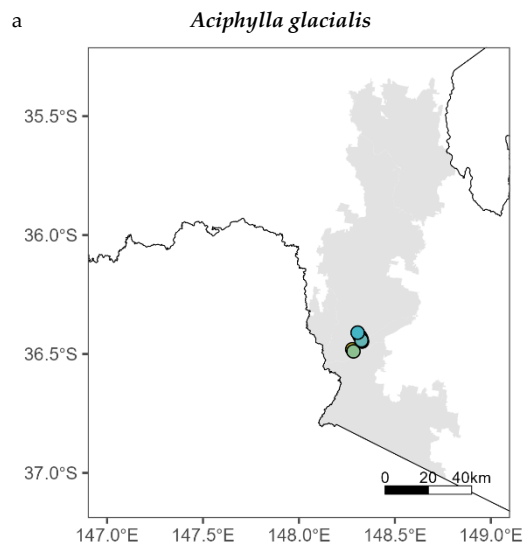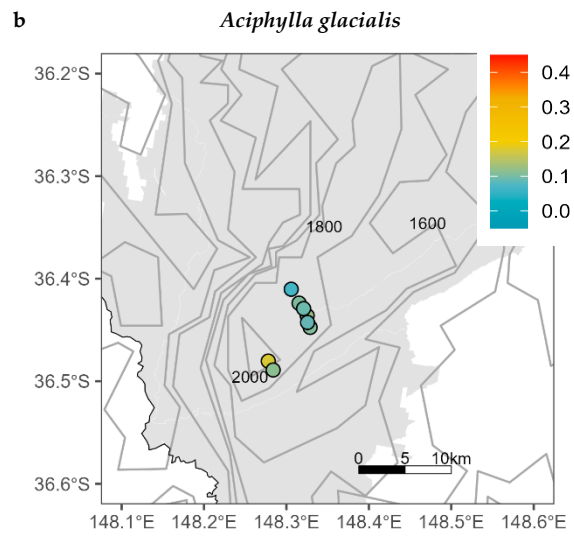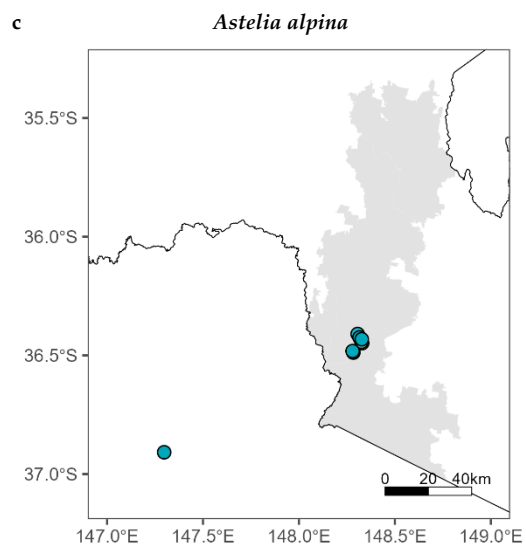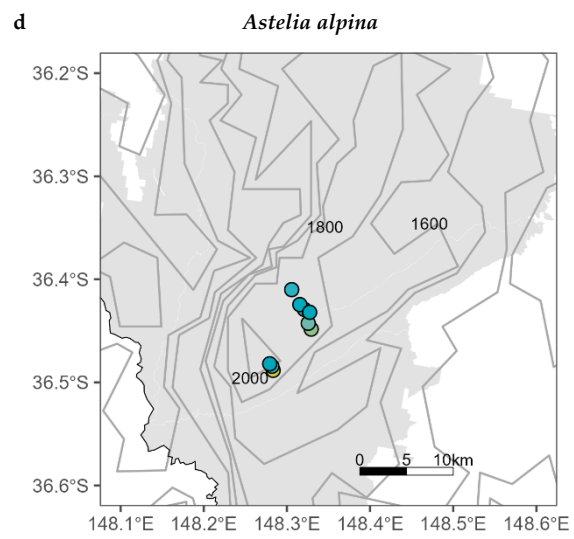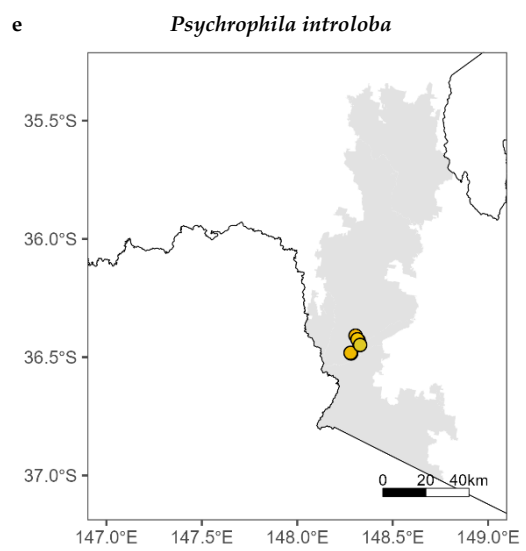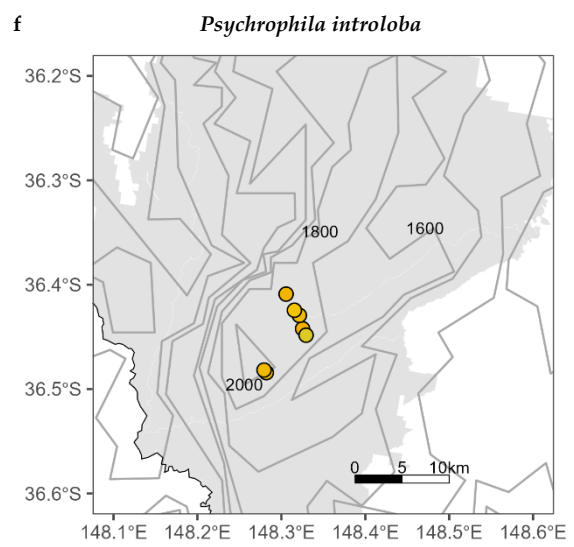

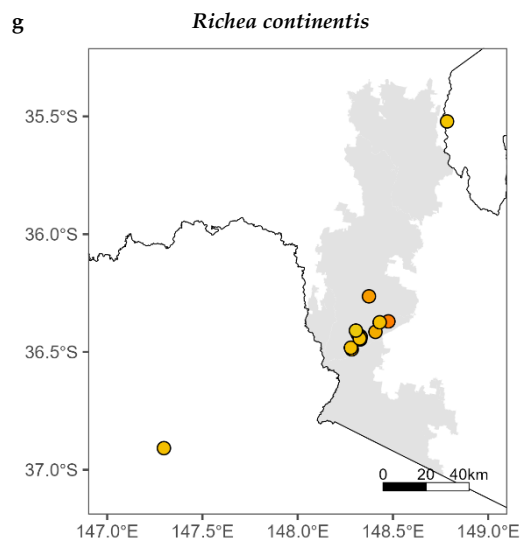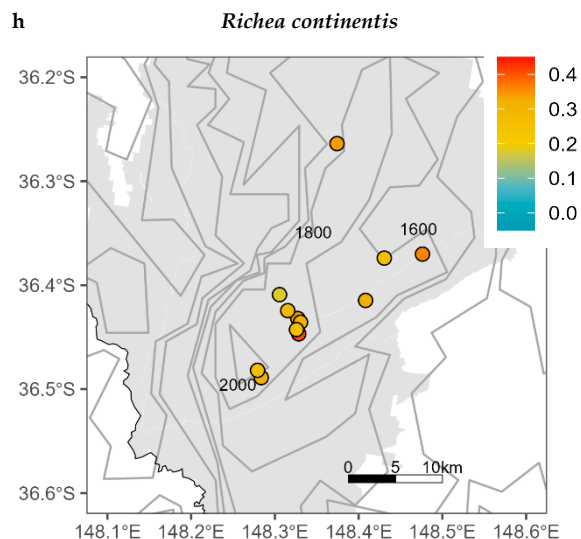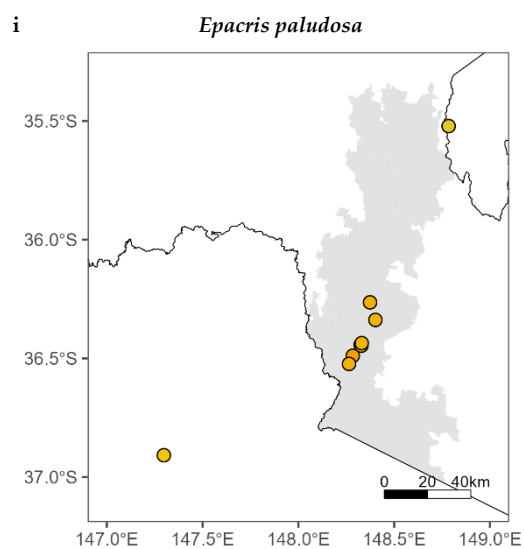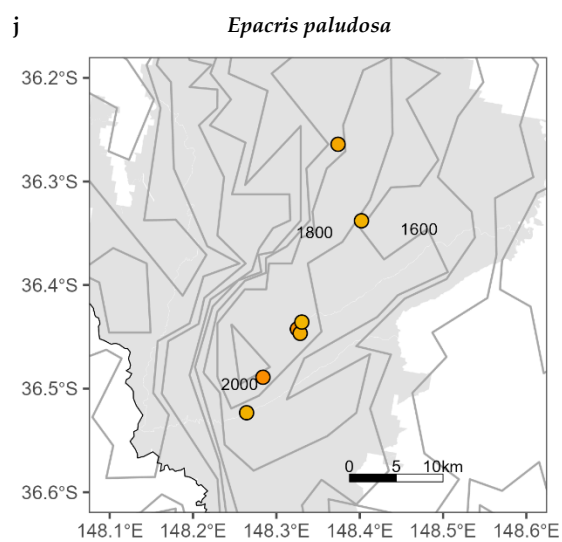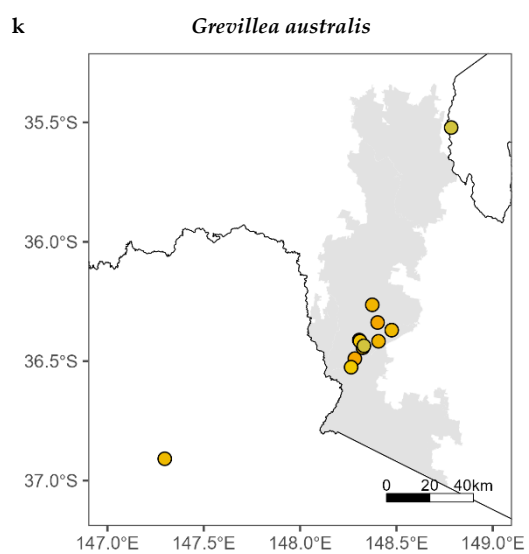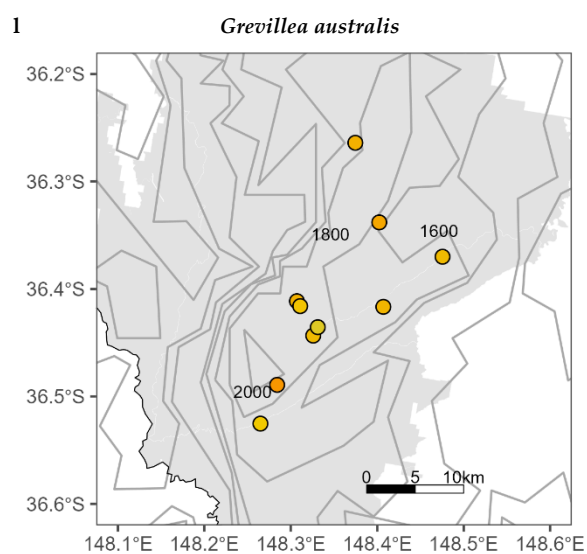

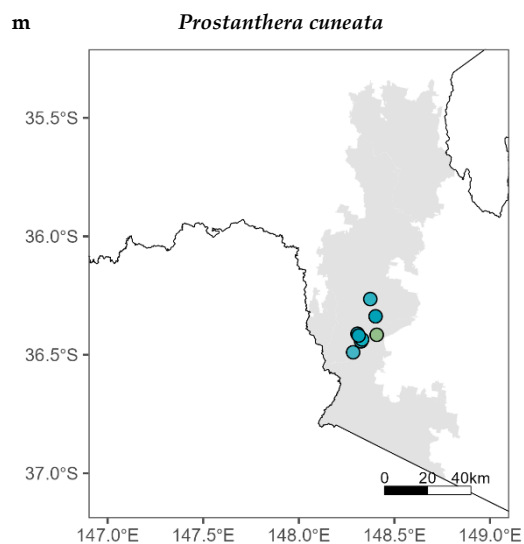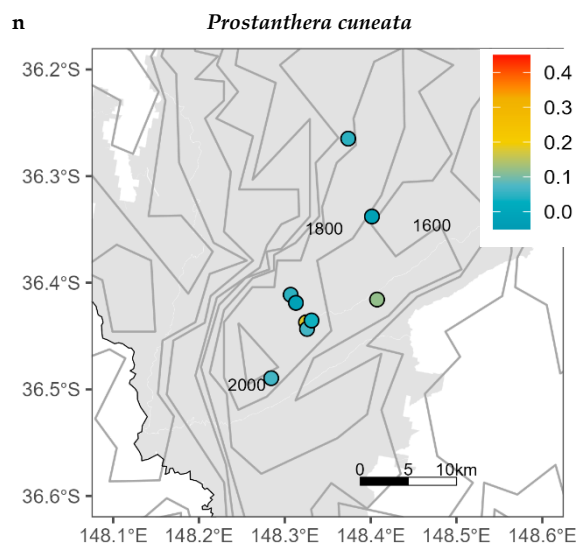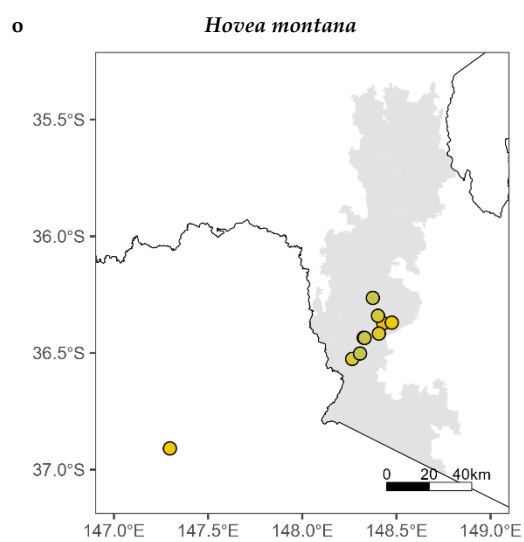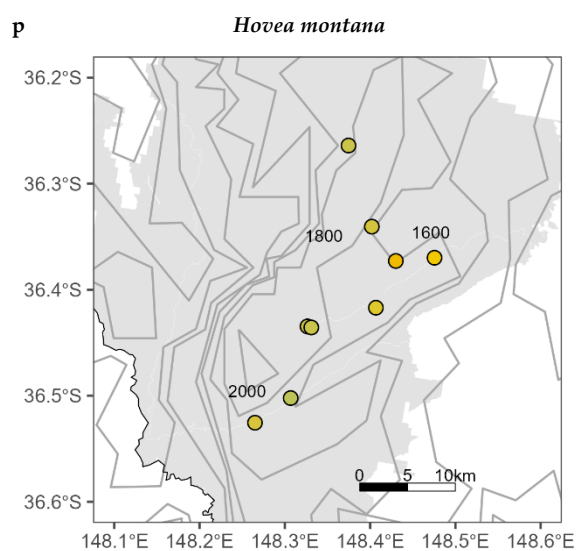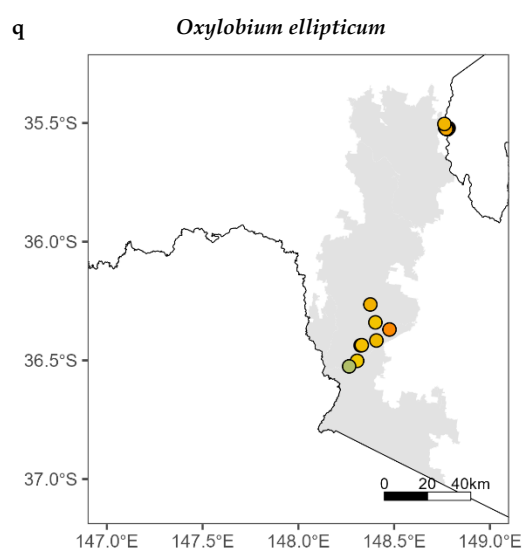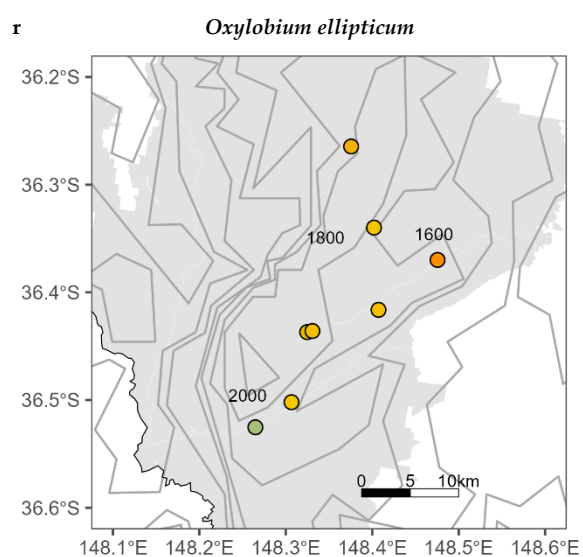

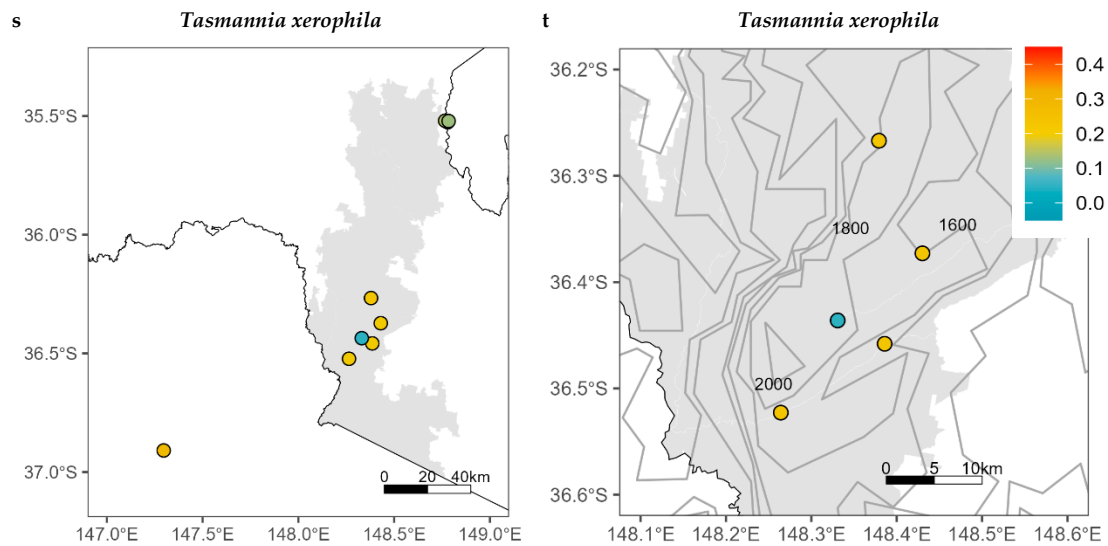

Figure S4. Within-population inbreeding ( $F_{is}$ ) of alpine plants across south-eastern Australia (left panels) and within Kosciuszko National Park, NSW (right panels). Colours of circles indicates increasing  $F_{is}$ . The grey area represents the boundary of Kosciuszko National Park and the black borders represent state boundaries for ACT, NSW and VIC. On the right panels, the grey contour lines represent elevation with intervals of 200m. The study regions are Namadgi, ACT, Kosciuszko National Park, NSW, and Alpine National Park, Victoria.

Table S10. Average evaluation metrics and their standard deviation (in paranthesis), indicating the overall performance of the general linear model (GLM) and random forest (RF) models for three focal species: *Astelia alpina*, *Richea continentis* and *Epacris paludosa*. Each model algorithm underwent 50 runs (100 runs total).

| Species                   | Algorithm | Model validation | Sensitivity   | Specificity   | Percentage of models kept (over 50 runs) |
|---------------------------|-----------|------------------|---------------|---------------|------------------------------------------|
| <i>Astelia alpina</i>     | GLM       | ROC              | 0.877 (0.03)  | 86.122 (3.61) | 81.988 (3.28)                            |
|                           |           | TSS              | 0.604 (0.07)  | 86.122 (3.79) | 81.697 (3.67)                            |
|                           | RF        | ROC              | 0.922 (0.03)  | 99.927 (0.29) | 99.103 (0.65)                            |
|                           |           | TSS              | 0.688 (0.09)  | 99.902 (0.33) | 99.055 (0.66)                            |
| <i>Richea continentis</i> | GLM       | ROC              | 0.979 (0.01)  | 97.460 (0.68) | 96.120 (0.76)                            |
|                           |           | TSS              | 0.911 (0.03)  | 97.487 (0.75) | 96.053 (0.84)                            |
|                           | RF        | ROC              | 0.979 (0.01)  | 99.539 (0.82) | 98.580 (0.77)                            |
|                           |           | TSS              | 0.909 (0.04)  | 99.500 (0.87) | 98.547 (0.82)                            |
| <i>Epacris paludosa</i>   | GLM       | ROC              | 0.963 (0.006) | 90.885 (0.85) | 90.505 (0.67)                            |
|                           |           | TSS              | 0.805 (0.02)  | 90.821 (0.86) | 90.458 (0.67)                            |
|                           | RF        | ROC              | 0.987 (0.003) | 99.867 (0.13) | 99.623 (0.15)                            |
|                           |           | TSS              | 0.878 (0.02)  | 99.860 (0.14) | 99.603 (0.13)                            |
